# Supplementary material
Source: Research Square preprint supplement (doi:10.21203/rs.3.rs-9572451/v1)
Supplement: Supplementary file 1 [file e89948751b355a0da38766d4.docx]

**Supp Table 1.** Comparison of Anatomical and Morphometric Characteristics Between Female and Male Patients (n = 261)

|  | All  (n=261) | Female  (n=107) | Male  (n=154) | *P value* |
| --- | --- | --- | --- | --- |
| Carina to CAJ (mm) | 0.00-58.00 (36.00) | 10.00-56.00 (35.00) | 0.00-58.00 (37.00) | 0.1381 |
| 35.39±10.70 | 34.28±9.98 | 36.16±11.14 |
| Carina to CAJ (VBU) | 0.00-2.60 (1.60) | 0.30-2.30 (1.60) | 0.00-2.60 (1.60) | 0.3345 |
| 1.53±0.47 | 1.53±0.46 | 1.51±0.48 |
| SVC length (mm) | 32.00-96.00 (64.00) | 32.00-80.00 (62.00) | 43.00-96.00 (65.00) | **0.0019**** |
| 64.54±10.61 | 61.66±9.18 | 66.54±11.10 |
| IJV diameter (mm) | 8.20-21.00 (12.40) | 8.20-18.00 (12.00) | 8.30-21.00 (13.00) | **0.0317**** |
| 12.76±2.51 | 12.42±2.44 | 13.00±2.55 |

All measurements were obtained from thoracic computed tomography (CT) scans. Numerical data were summarized as mean ± standard deviation along with median (minimum–maximum). P values were calculated using the Mann–Whitney U test. A **p-value < 0.05** was considered statistically significant.

**Abbreviations:** CAJ, cavoatrial junction; IJV, internal jugular vein; SVC, superior vena cava; VBU, vertebral body unit.
